# Supplementary material for: An immunotherapy response prediction model derived from proliferative CD4+ T cells and antigen-presenting monocytes in ccRCC
Source: PubMed Central journal article supplement (PMC9452905; doi:10.3389/fimmu.2022.972227), 2022-08-25
Supplement: DataSheet_2.pdf [file DataSheet_2.pdf]

**Supplementary Table 1.** Characteristics of ICB scRNA-seq datasets and bulk RNA-seq cohort.

a. Single-cell RNA-seq datasets

| Dataset Name        | All Patients | Response  |            |    | Treatment        |               |          |       | References |
|---------------------|--------------|-----------|------------|----|------------------|---------------|----------|-------|------------|
|                     |              | R (CR/PR) | NR (PD/SD) | NE | aPD-1            | aPD-1+aCTLA-4 | aPD1+TKI | NoICB |            |
| <b>Bi's dataset</b> | 8            | 2         | 2          | 1  | 2                | 1             | 2        | 3     | (1)        |
| <b>Au's dataset</b> | 2            | 1         | 1          | -  | 2<br>(Nivolumab) | -             | -        | -     | (2)        |

b. Bulk RNA-seq cohorts

| Cohorts              | All Patients | Response  |            |    | Treatment                                   | OS | PFS | TMB | ITH | Sex | Age | PBRM1 | VHL | Purity | Ploidy | References |
|----------------------|--------------|-----------|------------|----|---------------------------------------------|----|-----|-----|-----|-----|-----|-------|-----|--------|--------|------------|
|                      |              | R (CR/PR) | NR (PD/SD) | NE |                                             |    |     |     |     |     |     |       |     |        |        |            |
| <b>Checkmate</b>     | 181          | 39        | 133        | 9  | Nivolumab                                   | √  | √   | √   | √   | √   | √   | √     | √   | √      | √      | (3-6)      |
| <b>Checkmate 025</b> | 120          | 25        | 86         | 9  | Nivolumab                                   | √  | √   | √   | √   | √   | √   | √     | √   | √      | √      | (6)        |
| <b>Checkmate 010</b> | 45           | 11        | 34         | -  | Nivolumab                                   | √  | √   | √   | √   | √   | √   | √     | √   | √      | √      | (5)        |
| <b>Checkmate 009</b> |              |           |            |    |                                             |    |     |     |     |     |     |       |     |        |        | (4, 7)     |
| CM009_PRE            | 59           | 9         | 47         | 3  | Nivolumab                                   | √  | √   | √   | -   | √   | -   | √     | √   | -      | -      |            |
| CM009_POST           | 55           | 5         | 47         | 3  | Nivolumab                                   | √  | √   | √   | -   | √   | -   | √     | √   | -      | -      |            |
| CM010_Paired         | 42           | 5         | 37         | -  | Nivolumab                                   | √  | √   | √   | -   | √   | -   | √     | √   | -      | -      |            |
| <b>PMC6035749</b>    | 17           | 5         | 12         | -  | Nivolumab                                   | √  | √   | -   | -   | √   | -   | -     | -   | -      | -      | (8)        |
| <b>GSE67501</b>      | 11           | 4         | 7          | -  | Nivolumab                                   | √  | √   | -   | -   | √   | √   | -     | -   | -      | -      | (9)        |
| <b>Javelin 101</b>   | 726          | -         | -          | -  | Avelumab+Axitinib:<br>354<br>Sunitinib: 372 | -  | √   | -   | -   | √   | √   | -     | -   | -      | -      | (10)       |

**Supplementary Table 2.** Detailed information of ccRCC.Sig. Analysed by Ingenuity Pathway

Analysis (IPA).

| No. | Symbol | Entrez Gene Name                                                        | Location               | Type(s)                          | Drug(s)                     |
|-----|--------|-------------------------------------------------------------------------|------------------------|----------------------------------|-----------------------------|
| 1   | ALCAM  | activated leukocyte cell<br>adhesion molecule                           | Plasma<br>Membrane     | other                            | praluzatamab, ravtansine    |
| 2   | ASF1B  | anti-silencing function 1B<br>histone chaperone                         | Nucleus                | other                            |                             |
| 3   | C1QB   | complement C1q B chain                                                  | Extracellular<br>Space | other                            |                             |
| 4   | C1QC   | complement C1q C chain                                                  | Extracellular<br>Space | other                            |                             |
| 5   | C5AR1  | complement C5a receptor<br>1                                            | Plasma<br>Membrane     | G-protein<br>coupled<br>receptor | TJ210001, avacopan, IPH5401 |
| 6   | CDC45  | cell division cycle 45                                                  | Nucleus                | other                            |                             |
| 7   | CDCA2  | cell division cycle<br>associated 2                                     | Nucleus                | other                            |                             |
| 8   | CENPQ  | centromere protein Q                                                    | Nucleus                | other                            |                             |
| 9   | CEP55  | centrosomal protein 55                                                  | Cytoplasm              | other                            |                             |
| 10  | CXCL10 | C-X-C motif chemokine<br>ligand 10                                      | Extracellular<br>Space | cytokine                         | MDX-1100                    |
| 11  | DNA2   | DNA replication<br>helicase/nuclease 2                                  | Cytoplasm              | enzyme                           |                             |
| 12  | DUT    | deoxyuridine<br>triphosphatase                                          | Nucleus                | enzyme                           | TAS-114                     |
| 13  | E2F2   | E2F transcription factor 2                                              | Nucleus                | transcription<br>regulator       |                             |
| 14  | E2F3   | E2F transcription factor 3                                              | Nucleus                | transcription<br>regulator       |                             |
| 15  | E2F8   | E2F transcription factor 8                                              | Nucleus                | transcription<br>regulator       |                             |
| 16  | EGR1   | early growth response 1                                                 | Nucleus                | transcription<br>regulator       |                             |
| 17  | ESCO2  | establishment of sister<br>chromatid cohesion N-<br>acetyltransferase 2 | Nucleus                | enzyme                           |                             |
| 18  | EXO1   | exonuclease 1                                                           | Nucleus                | enzyme                           |                             |
| 19  | FANCG  | FA complementation<br>group G                                           | Nucleus                | other                            |                             |
| 20  | FBXO43 | F-box protein 43                                                        | Nucleus                | other                            |                             |
| 21  | FCGR2B | Fc fragment of IgG<br>receptor IIb                                      | Plasma<br>Membrane     | transmembrane<br>receptor        | IgG, BI-1206, XmAb5871      |
| 22  | FEN1   | flap structure-specific<br>endonuclease 1                               | Nucleus                | enzyme                           |                             |

|    |         |                                                      |                     |                         |                                                                           |
|----|---------|------------------------------------------------------|---------------------|-------------------------|---------------------------------------------------------------------------|
| 23 | HAVCR2  | hepatitis A virus cellular receptor 2                | Plasma Membrane     | other                   | LY3415244, anti-TIM-3 monoclonal antibody, Sym023, RO7121661, TSR-022     |
| 24 | HIRIP3  | HIRA interacting protein 3                           | Nucleus             | other                   |                                                                           |
| 25 | HLA-DOA | major histocompatibility complex, class II, DO alpha | Plasma Membrane     | transmembrane receptor  |                                                                           |
| 26 | HMGB3   | high mobility group box 3                            | Nucleus             | other                   |                                                                           |
| 27 | IDO1    | indoleamine 2,3-dioxygenase 1                        | Cytoplasm           | enzyme                  | LY3381916, HTI-1090, navaximod, KHK2455, PF-06840003                      |
| 28 | IL18    | interleukin 18                                       | Extracellular Space | cytokine                |                                                                           |
| 29 | KIF14   | kinesin family member 14                             | Cytoplasm           | enzyme                  |                                                                           |
| 30 | LIG1    | DNA ligase 1                                         | Nucleus             | enzyme                  |                                                                           |
| 31 | MBD3    | methyl-CpG binding domain protein 3                  | Nucleus             | other                   |                                                                           |
| 32 | NEIL3   | nei like DNA glycosylase 3                           | Nucleus             | enzyme                  |                                                                           |
| 33 | OIP5    | Opa interacting protein 5                            | Nucleus             | other                   |                                                                           |
| 34 | PHPT1   | phosphohistidine phosphatase 1                       | Cytoplasm           | phosphatase             |                                                                           |
| 35 | POLA2   | DNA polymerase alpha 2, accessory subunit            | Nucleus             | enzyme                  |                                                                           |
| 36 | POLD1   | DNA polymerase delta 1, catalytic subunit            | Nucleus             | enzyme                  | entecavir, cytarabine, clofarabine, tenofovir diphosphate, L-asparaginase |
| 37 | POLE    | DNA polymerase epsilon, catalytic subunit            | Nucleus             | enzyme                  | cladribine, trifluridine, clofarabine, bortezomib                         |
| 38 | PTMS    | parathymosin                                         | Nucleus             | other                   |                                                                           |
| 39 | RAD51C  | RAD51 paralog C                                      | Nucleus             | enzyme                  |                                                                           |
| 40 | RBX1    | ring-box 1                                           | Cytoplasm           | enzyme                  |                                                                           |
| 41 | RMI2    | RecQ mediated genome instability 2                   | Nucleus             | other                   |                                                                           |
| 42 | SPC24   | SPC24 component of NDC80 kinetochore complex         | Cytoplasm           | other                   |                                                                           |
| 43 | TRIP13  | thyroid hormone receptor interactor 13               | Cytoplasm           | transcription regulator |                                                                           |
| 44 | TTBK1   | tau tubulin kinase 1                                 | Other               | kinase                  |                                                                           |
| 45 | TUBA1C  | tubulin alpha 1c                                     | Cytoplasm           | other                   | docetaxel, bevacizumab, cyclophosphamide, L-asparaginase, prednisone      |
| 46 | VNN1    | vanin 1                                              | Plasma Membrane     | enzyme                  |                                                                           |
| 47 | XRCC2   | X-ray repair cross complementing 2                   | Nucleus             | enzyme                  |                                                                           |

**Supplementary Table 3.** Thirteen published ICB response prediction signatures.

| <b>Signature</b>           | <b>References</b> | <b>Description</b>                                                                                                                                       |
|----------------------------|-------------------|----------------------------------------------------------------------------------------------------------------------------------------------------------|
| <b>B.Sig</b>               | (11)              | A 9-gene expression profiles of B cell markers.                                                                                                          |
| <b>Stem.Sig</b>            | (12)              | A 454-gene stemness signature identified by large-scale single cell RNA sequencing analysis                                                              |
| <b>ImmuneCells.Sig</b>     | (13)              | A 108-gene expression signature of TREM2hi macrophages, $\gamma\delta$ T cells and a subset of B cells.                                                  |
| <b>IFNG.Sig</b>            | (14)              | A 6-gene signature of interferon gamma (IFN $\gamma$ ) response biomarkers.                                                                              |
| <b>CD8.Sig</b>             | (15)              | A 5-gene expression profiles of CD8+ T cell markers.                                                                                                     |
| <b>IMPRES.Sig</b>          | (16)              | A 28 immune checkpoint genes signature that estimate immuno-predictive score (IMPRES).                                                                   |
| <b>IRG.Sig</b>             | (17)              | A 11 immune-related genes (IRGs) signature for predicting cervical cancer patients' response to immune checkpoint inhibitors.                            |
| <b>LRRC15.CAF.Sig</b>      | (18)              | A 14-gene expression signature of LRRC15+ Cancer associated fibroblast.                                                                                  |
| <b>T.cell.inflamed.Sig</b> | (14, 19)          | An 18-gene signature of T-cell–inflamed gene expression profiles that can predict clinical benefit of anti-PD-1 in pan-cancer.                           |
| <b>IPRES.Sig</b>           | (20, 21)          | A 16-gene signature involved in 73 pathways with innate anti-PD-1 resistance (IPRES).                                                                    |
| <b>Inflammatory.Sig</b>    | (21)              | A 27 inflammation related genes expression signature that predicted response to immune checkpoint blockade in lung cancer.                               |
| <b>EMT.Sig</b>             | (21)              | A 12 epithelial-to-mesenchymal transition (EMT) related genes expression signature that predicted response to immune checkpoint blockade in lung cancer. |
| <b>Blood.Sig</b>           | (22)              | A 15-gene expression signature developed from blood samples that can predict response to anti-CTLA4 immunotherapy.                                       |

**Supplementary Table 4.** Comparison of AUC and p-value of previously published signatures.

Related to Figure 5 and Supplementary Figure 12.

## a. AUC

| Signatures          | Checkmate | CM025 | CM010 | CM009_PRE | PMC6035749 | GSE67501 |
|---------------------|-----------|-------|-------|-----------|------------|----------|
| ccRCC.Sig           | 0.93      | 0.88  | 0.99  | 0.89      | 0.87       | 1.00     |
| B.Sig               | 0.61      | 0.65  | 0.62  | 0.65      | 0.73       | 0.46     |
| Stem.Sig            | 0.84      | 0.90  | 0.79  | 0.70      | 0.91       | 0.92     |
| ImmuneCells.Sig     | 0.81      | 0.83  | 0.97  | 0.83      | 1.00       | 1.00     |
| IFNG.Sig            | 0.60      | 0.58  | 0.78  | 0.69      | 0.72       | 0.93     |
| CD8.Sig             | 0.57      | 0.51  | 0.68  | 0.77      | 0.58       | 0.82     |
| IMPRES.Sig          | 0.70      | 0.70  | 0.88  | 0.81      | 0.90       | 1.00     |
| IRG.Sig             | 0.62      | 0.63  | 0.70  | 0.71      | 0.78       | 1.00     |
| LRRC15.CAF.Sig      | 0.63      | 0.61  | 0.73  | 0.72      | 0.83       | 0.79     |
| T.cell.inflamed.Sig | 0.64      | 0.72  | 0.83  | 0.82      | 0.83       | 0.89     |
| IPRES.Sig           | 0.61      | 0.63  | 0.69  | 0.77      | 0.97       | 0.82     |
| Inflammatory.Sig    | 0.64      | 0.66  | 0.84  | 0.79      | 0.80       | 0.93     |
| EMT.Sig             | 0.66      | 0.65  | 0.70  | 0.79      | 0.77       | 0.79     |
| Blood.Sig           | 0.58      | 0.56  | 0.78  | 0.79      | 0.82       | 1.00     |

## b. P-value

| Signatures          | Checkmate | CM025   | CM010  | CM009_PRE | PMC6035749 | GSE67501 |
|---------------------|-----------|---------|--------|-----------|------------|----------|
| ccRCC.Sig           | 7.20E-07  | 0.00034 | 0.0084 | 0.16      | 0.29       | 0.11     |
| B.Sig               | 0.28      | 0.27    | 0.31   | 0.24      | 0.81       | 0.59     |
| Stem.Sig            | 0.0023    | 0.011   | 0.18   | 0.29      | 0.12       | 0.32     |
| ImmuneCells.Sig     | 0.022     | 0.028   | 0.0096 | 0.24      | 0.16       | 0.11     |
| IFNG.Sig            | 0.37      | 0.33    | 0.21   | 0.09      | 0.47       | 0.18     |
| CD8.Sig             | 0.32      | 0.61    | 0.092  | 0.23      | 0.76       | 0.32     |
| IMPRES.Sig          | 0.073     | 0.24    | 0.042  | 0.17      | 0.21       | 0.14     |
| IRG.Sig             | 0.11      | 0.39    | 0.33   | 0.28      | 0.54       | 0.11     |
| LRRC15.CAF.Sig      | 0.081     | 0.18    | 0.42   | 0.28      | 0.37       | 0.32     |
| T.cell.inflamed.Sig | 0.2       | 0.075   | 0.1    | 0.12      | 0.35       | 0.24     |
| IPRES.Sig           | 0.21      | 0.19    | 0.33   | 0.23      | 0.33       | 0.39     |
| Inflammatory.Sig    | 0.11      | 0.12    | 0.1    | 0.23      | 0.3        | 0.32     |
| EMT.Sig             | 0.14      | 0.25    | 0.25   | 0.12      | 0.37       | 0.27     |
| Blood.Sig           | 0.45      | 0.54    | 0.092  | 0.16      | 0.3        | 0.11     |

## References

1. Bi K, He MX, Bakouny Z, Kanodia A, Napolitano S, Wu J, et al. Tumor and Immune Reprogramming During Immunotherapy in Advanced Renal Cell Carcinoma. *Cancer Cell* (2021) 39(5):649-61 e5. Epub 2021/03/13. doi: 10.1016/j.ccell.2021.02.015.
2. Au L, Hatipoglu E, Robert de Massy M, Litchfield K, Beattie G, Rowan A, et al. Determinants of Anti-Pd-1 Response and Resistance in Clear Cell Renal Cell Carcinoma. *Cancer Cell* (2021) 39(11):1497-518 e11. Epub 2021/10/30. doi: 10.1016/j.ccell.2021.10.001.
3. Braun DA, Hou Y, Bakouny Z, Ficial M, Sant' Angelo M, Forman J, et al. Interplay of Somatic Alterations and Immune Infiltration Modulates Response to Pd-1 Blockade in Advanced Clear Cell Renal Cell Carcinoma. *Nat Med* (2020) 26(6):909-18. Epub 2020/05/31. doi: 10.1038/s41591-020-0839-y.
4. Choueiri T, Fishman M, Escudier B, McDermott D, Drake C, Kluger H, et al. Immunomodulatory Activity of Nivolumab in Metastatic Renal Cell Carcinoma. *Clinical cancer research : an official journal of the American Association for Cancer Research* (2016) 22(22):5461-71. doi: 10.1158/1078-0432.Ccr-15-2839.
5. Motzer R, Rini B, McDermott D, Redman B, Kuzel T, Harrison M, et al. Nivolumab for Metastatic Renal Cell Carcinoma: Results of a Randomized Phase II Trial. *Journal of clinical oncology : official journal of the American Society of Clinical Oncology* (2015) 33(13):1430-7. doi: 10.1200/jco.2014.59.0703.
6. Motzer R, Tannir N, McDermott D, Arén Frontera O, Melichar B, Choueiri T, et al. Nivolumab Plus Ipilimumab Versus Sunitinib in Advanced Renal-Cell Carcinoma. *The New England journal of medicine* (2018) 378(14):1277-90. doi: 10.1056/NEJMoa1712126.
7. Mahoney KM, Ross-Macdonald P, Yuan L, Song L, Veras E, Wind-Rotolo M, et al. Soluble Pd-L1 as an Early Marker of Progressive Disease on Nivolumab. *J Immunother Cancer* (2022) 10(2). Epub 2022/02/09. doi: 10.1136/jitc-2021-003527.
8. Miao D, Margolis C, Gao W, Voss M, Li W, Martini D, et al. Genomic Correlates of Response to Immune Checkpoint Therapies in Clear Cell Renal Cell Carcinoma. *Science (New York, NY)* (2018) 359(6377):801-6. doi: 10.1126/science.aan5951.
9. Ascierto ML, McMiller TL, Berger AE, Danilova L, Anders RA, Netto GJ, et al. The Intratumoral Balance between Metabolic and Immunologic Gene Expression Is Associated with Anti-Pd-1 Response in Patients with Renal Cell Carcinoma. *Cancer Immunol Res* (2016) 4(9):726-33. Epub 2016/08/06. doi: 10.1158/2326-6066.CIR-16-0072.
10. Motzer RJ, Robbins PB, Powles T, Albiges L, Haanen JB, Larkin J, et al. Avelumab Plus Axitinib Versus Sunitinib in Advanced Renal Cell Carcinoma: Biomarker Analysis of the Phase 3 Javelin Renal 101 Trial. *Nat Med* (2020) 26(11):1733-41. Epub 2020/09/09. doi: 10.1038/s41591-020-1044-8.
11. Helmink BA, Reddy SM, Gao J, Zhang S, Basar R, Thakur R, et al. B Cells and Tertiary Lymphoid Structures Promote Immunotherapy Response. *Nature* (2020) 577(7791):549-55. Epub 2020/01/17. doi: 10.1038/s41586-019-1922-8.
12. Zhang Z, Wang Z, Chen Y, Wu H, Yin L, Zhao Q, et al. Integrated Analysis of Single-Cell and Bulk RNA Sequencing Data Reveals a Pan-Cancer Stemness Signature Predicting Immunotherapy Response. *Genome medicine* (2022) 14(1):45. doi: 10.1186/s13073-022-01050-w.
13. Xiong D, Wang Y, You M. A Gene Expression Signature of Trem2(Hi) Macrophages and Gammadelta T Cells Predicts Immunotherapy Response. *Nat Commun* (2020) 11(1):5084. Epub 2020/10/10. doi: 10.1038/s41467-020-18546-x.
14. Ayers M, Lunceford J, Nebozhyn M, Murphy E, Loboda A, Kaufman DR, et al. Ifn-Gamma-Related Mrna Profile Predicts Clinical Response to Pd-1 Blockade. *J Clin Invest* (2017) 127(8):2930-40. Epub 2017/06/27. doi: 10.1172/JCI91190.
15. Jiang P, Gu S, Pan D, Fu J, Sahu A, Hu X, et al. Signatures of T Cell Dysfunction and Exclusion Predict Cancer Immunotherapy Response. *Nat Med* (2018) 24(10):1550-8. Epub 2018/08/22. doi: 10.1038/s41591-018-0136-1.
16. Auslander N, Zhang G, Lee JS, Frederick DT, Miao B, Moll T, et al. Robust Prediction of Response to Immune Checkpoint

- Blockade Therapy in Metastatic Melanoma. *Nat Med* (2018) 24(10):1545-9. Epub 2018/08/22. doi: 10.1038/s41591-018-0157-9.
17. Yang S, Wu Y, Deng Y, Zhou L, Yang P, Zheng Y, et al. Identification of a Prognostic Immune Signature for Cervical Cancer to Predict Survival and Response to Immune Checkpoint Inhibitors. *Oncoimmunology* (2019) 8(12):e1659094. Epub 2019/11/20. doi: 10.1080/2162402X.2019.1659094.
18. Dominguez CX, Muller S, Keerthivasan S, Koeppen H, Hung J, Gierke S, et al. Single-Cell RNA Sequencing Reveals Stromal Evolution into Lrrc15(+) Myofibroblasts as a Determinant of Patient Response to Cancer Immunotherapy. *Cancer Discov* (2020) 10(2):232-53. Epub 2019/11/09. doi: 10.1158/2159-8290.CD-19-0644.
19. Huang AC, Orlowski RJ, Xu X, Mick R, George SM, Yan PK, et al. A Single Dose of Neoadjuvant Pd-1 Blockade Predicts Clinical Outcomes in Resectable Melanoma. *Nat Med* (2019) 25(3):454-61. Epub 2019/02/26. doi: 10.1038/s41591-019-0357-y.
20. Hugo W, Zaretsky JM, Sun L, Song C, Moreno BH, Hu-Lieskovan S, et al. Genomic and Transcriptomic Features of Response to Anti-Pd-1 Therapy in Metastatic Melanoma. *Cell* (2016) 165(1):35-44. Epub 2016/03/22. doi: 10.1016/j.cell.2016.02.065.
21. Thompson JC, Hwang WT, Davis C, Deshpande C, Jeffries S, Rajpurohit Y, et al. Gene Signatures of Tumor Inflammation and Epithelial-to-Mesenchymal Transition (Emt) Predict Responses to Immune Checkpoint Blockade in Lung Cancer with High Accuracy. *Lung Cancer* (2020) 139:1-8. Epub 2019/11/05. doi: 10.1016/j.lungcan.2019.10.012.
22. Friedlander P, Wassmann K, Christenfeld AM, Fisher D, Kyi C, Kirkwood JM, et al. Whole-Blood RNA Transcript-Based Models Can Predict Clinical Response in Two Large Independent Clinical Studies of Patients with Advanced Melanoma Treated with the Checkpoint Inhibitor, Tremelimumab. *J Immunother Cancer* (2017) 5(1):67. Epub 2017/08/16. doi: 10.1186/s40425-017-0272-z.
